# Supplementary material
Source: PubMed Central journal article supplement (PMC4223479)

Figure S1

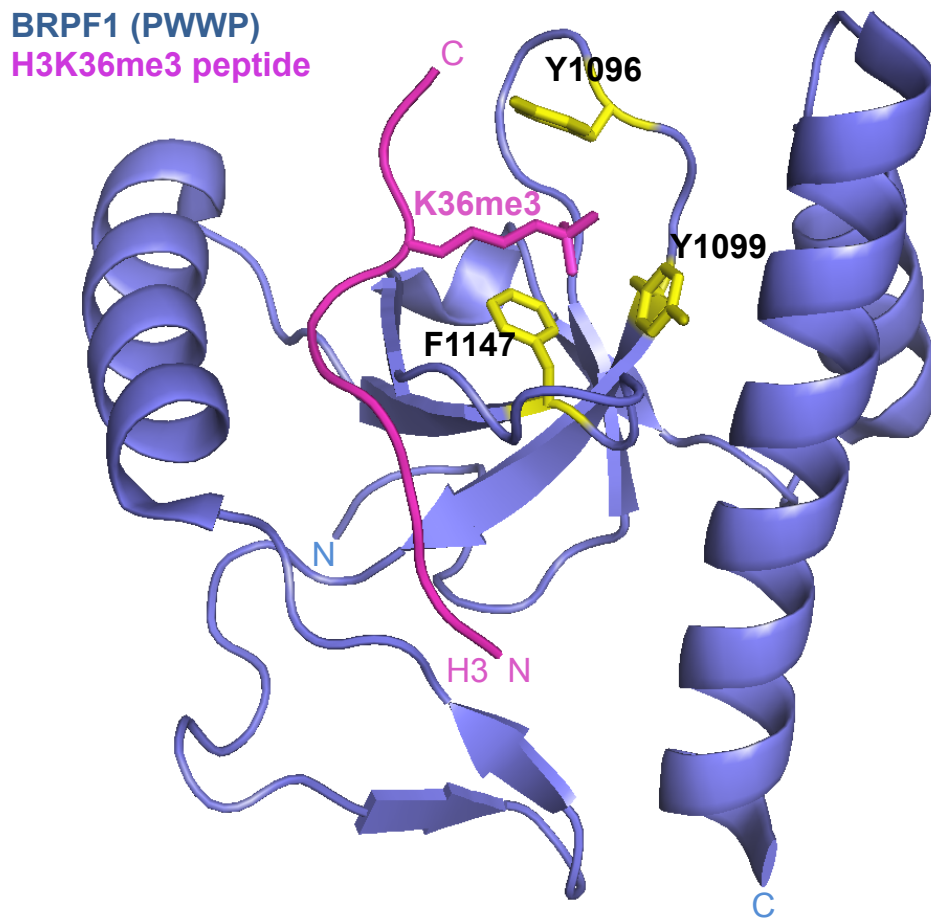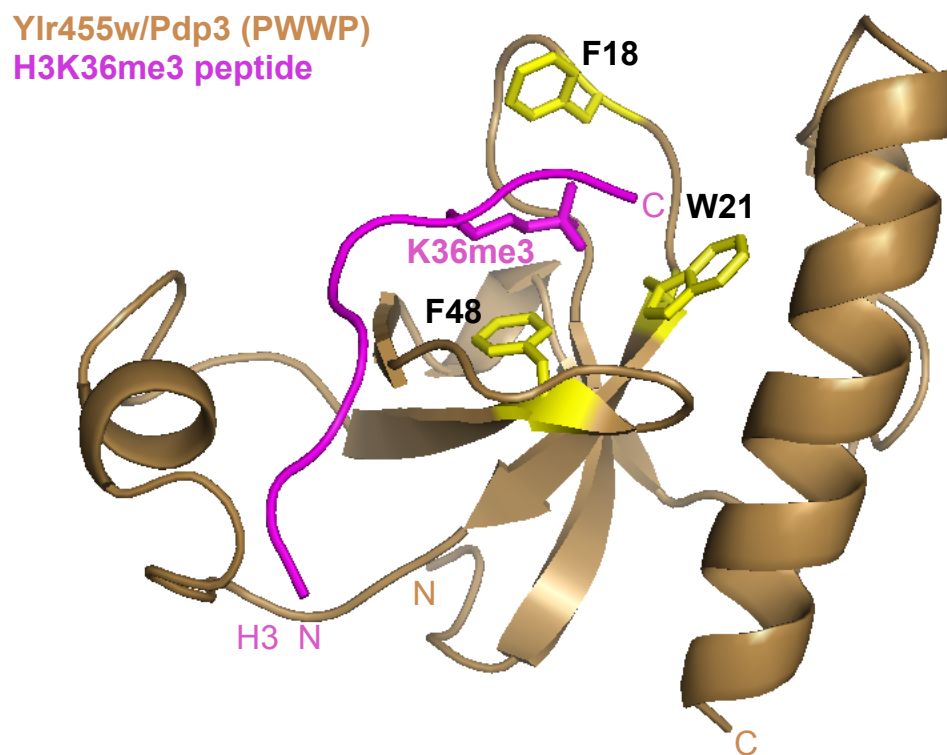

Supplement: supp_M114.038224_mcp.M114.038224-1.pdf [file supp_M114.038224_mcp.M114.038224-1.pdf]

Figure S2

A

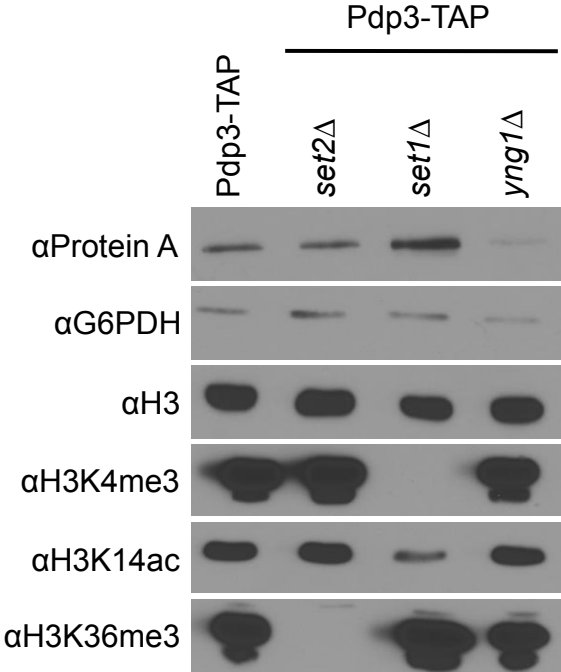

B

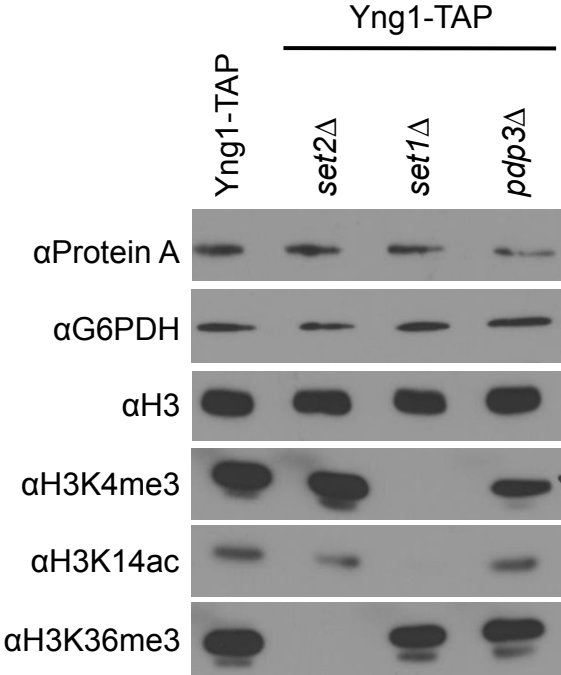

Supplement: supp_M114.038224_mcp.M114.038224-2.pdf [file supp_M114.038224_mcp.M114.038224-2.pdf]

Figure S3

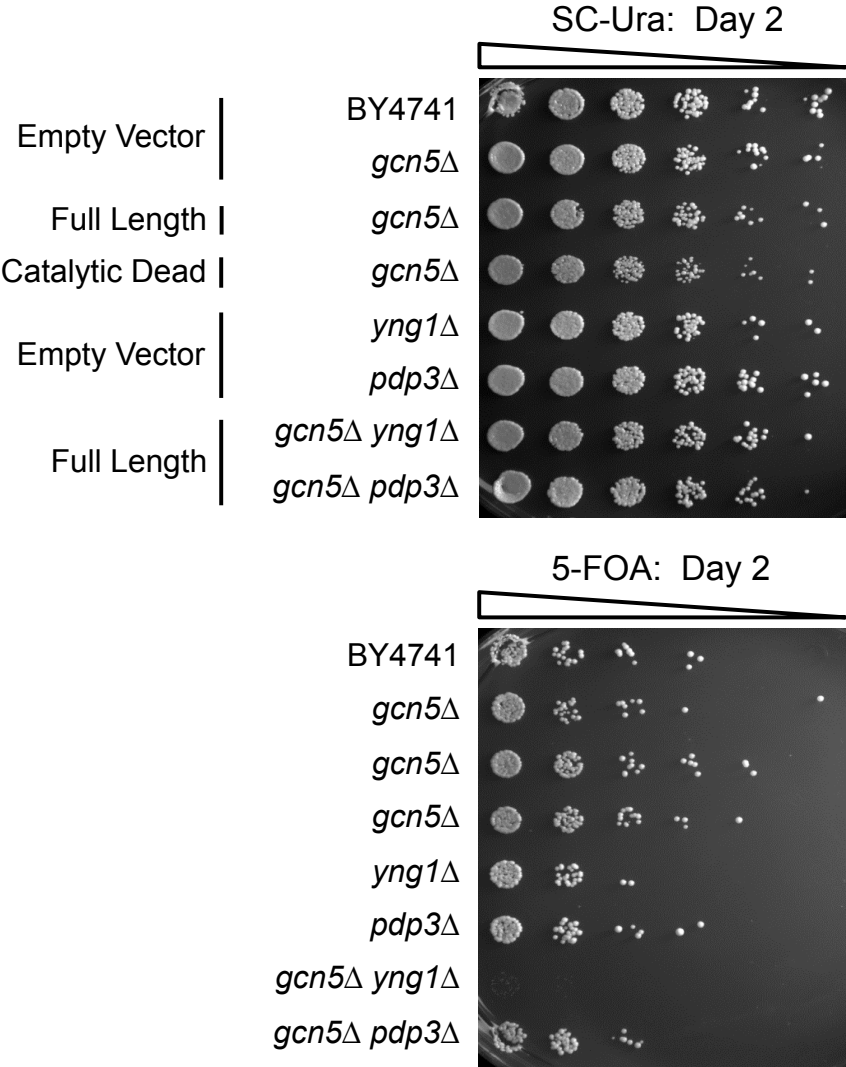

Supplement: supp_M114.038224_mcp.M114.038224-3.pdf [file supp_M114.038224_mcp.M114.038224-3.pdf]
